# Supplementary material for: Effect of Borrelia burgdorferi on the Expression of miRNAs in Breast Cancer and Normal Mammary Epithelial Cells
Source: MDPI journal article supplement (doi:10.3390/microorganisms11061475), 2023-06-01
Supplement: s1 [file s1]

| miRname (human) | Order<br>(by row) | Well | Cq<br>48hr Uninfected<br>(Control) | Cq<br>48hr Infected<br>(Experimental) |
|-----------------|-------------------|------|------------------------------------|---------------------------------------|
| hsa-let-7a-5p   | 1                 | A01  | 20.08                              | 18.29                                 |
| hsa-let-7b-5p   | 2                 | A02  | 21.36                              | 20.36                                 |
| hsa-let-7c-5p   | 3                 | A03  | 21.56                              | 19.47                                 |
| hsa-let-7d-5p   | 4                 | A04  | 22.93                              | 21.22                                 |
| UniSp2          | 5                 | A05  | 36.22                              | 38.06                                 |
| hsa-miR-200a-3p | 6                 | A06  | 31.15                              | 30.44                                 |
| hsa-let-7g-5p   | 7                 | A07  | 21.87                              | 20.05                                 |
| hsa-let-7i-5p   | 8                 | A08  | 20.90                              | 19.43                                 |
| hsa-miR-1       | 9                 | A09  | 37.05                              | 35.16                                 |
| hsa-miR-100-5p  | 10                | A10  | 20.34                              | 18.77                                 |
| hsa-let-7f-5p   | 11                | A11  | 22.27                              | 20.26                                 |
| hsa-miR-101-3p  | 12                | A12  | 24.62                              | 22.29                                 |
| hsa-miR-103a-3p | 13                | B01  | 21.05                              | 19.27                                 |
| hsa-miR-106a-5p | 14                | B02  | 21.65                              | 20.14                                 |
| hsa-miR-106b-5p | 15                | B03  | 22.52                              | 21.09                                 |
| hsa-miR-107     | 16                | B04  | 21.29                              | 19.81                                 |
| UniSp4          | 17                | B05  | 36.24                              | 32.00                                 |
| UniSp6          | 18                | B06  |                                    |                                       |
| hsa-miR-125b-5p | 19                | B07  | 19.62                              | 18.16                                 |
| hsa-miR-126-3p  | 20                | B08  | 26.24                              | 24.25                                 |
| hsa-miR-130a-3p | 21                | B09  | 22.61                              | 20.69                                 |
| hsa-miR-132-3p  | 22                | B10  | 25.77                              | 24.42                                 |
| hsa-miR-10b-5p  | 23                | B11  | 27.57                              | 25.67                                 |
| hsa-miR-133a-3p | 24                | B12  | 34.17                              | 33.11                                 |
| hsa-miR-141-3p  | 25                | C01  | 28.19                              | 26.82                                 |
| hsa-miR-143-3p  | 26                | C02  | 30.45                              | 30.02                                 |
| hsa-miR-145-5p  | 27                | C03  | 29.94                              | 29.35                                 |
| hsa-miR-146a-5p | 28                | C04  | 23.30                              | 20.81                                 |
| UniSp5          | 29                | C05  | 37.27                              | 37.55                                 |
| hsa-miR-26a-5p  | 30                | C06  | 22.09                              | 20.26                                 |
| hsa-miR-150-5p  | 31                | C07  | 30.58                              | 28.46                                 |
| hsa-miR-155-5p  | 32                | C08  | 38.35                              | 37.38                                 |
| hsa-miR-15a-5p  | 33                | C09  | 20.86                              | 19.21                                 |
| hsa-miR-15b-5p  | 34                | C10  | 22.63                              | 20.53                                 |
| hsa-miR-149-3p  | 35                | C11  | 30.89                              | 29.39                                 |
| hsa-miR-16-5p   | 36                | C12  | 21.08                              | 18.71                                 |
| hsa-miR-17-5p   | 37                | D01  | 22.51                              | 20.38                                 |

|                 |    |     |       |       |
|-----------------|----|-----|-------|-------|
| hsa-miR-181a-5p | 38 | D02 | 22.02 | 21.42 |
| hsa-miR-181b-5p | 39 | D03 | 23.49 | 22.14 |
| hsa-miR-182-5p  | 40 | D04 | 25.20 | 23.70 |
| cel-miR-39-3p   | 41 | D05 |       |       |
| hsa-miR-27a-3p  | 42 | D06 | 20.32 | 18.30 |
| hsa-miR-186-5p  | 43 | D07 | 26.64 | 24.49 |
| hsa-miR-18a-5p  | 44 | D08 | 24.01 | 22.23 |
| hsa-miR-191-5p  | 45 | D09 | 22.32 | 20.64 |
| hsa-miR-192-5p  | 46 | D10 | 26.13 | 24.52 |
| hsa-miR-148a-3p | 47 | D11 | 28.35 | 27.12 |
| hsa-miR-194-5p  | 48 | D12 | 25.81 | 24.36 |
| hsa-miR-195-5p  | 49 | E01 | 27.34 | 25.83 |
| hsa-miR-196a-5p | 50 | E02 | 28.37 | 27.20 |
| hsa-miR-19a-3p  | 51 | E03 | 20.49 | 18.68 |
| hsa-miR-19b-3p  | 52 | E04 | 20.79 | 19.14 |
| UniSp3 IPC      | 53 | E05 | 21.78 | 21.49 |
| hsa-miR-200b-3p | 54 | E06 | 30.06 | 28.51 |
| hsa-miR-200c-3p | 55 | E07 | 27.67 | 26.26 |
| hsa-miR-202-3p  | 56 | E08 | 36.97 | 33.30 |
| hsa-miR-10a-5p  | 57 | E09 | 25.33 | 24.21 |
| hsa-miR-205-5p  | 58 | E10 | 37.36 | 35.53 |
| hsa-miR-206     | 59 | E11 | 40.41 | 33.73 |
| hsa-miR-20a-5p  | 60 | E12 | 21.03 | 19.53 |
| hsa-miR-20b-5p  | 61 | F01 | 37.11 | 34.34 |
| hsa-miR-21-5p   | 62 | F02 | 16.03 | 14.49 |
| hsa-miR-210-3p  | 63 | F03 | 23.16 | 21.87 |
| hsa-miR-214-3p  | 64 | F04 | 29.76 | 26.65 |
| hsa-miR-215-5p  | 65 | F05 | 26.28 | 24.43 |
| SNORD38B        | 66 | F06 | 19.73 | 18.04 |
| hsa-miR-22-3p   | 67 | F07 | 20.01 | 18.95 |
| hsa-miR-221-3p  | 68 | F08 | 20.62 | 19.01 |
| hsa-miR-222-3p  | 69 | F09 | 20.32 | 18.36 |
| hsa-miR-223-3p  | 70 | F10 | 33.60 | 31.57 |
| U6 snRNA        | 71 | F11 | 18.17 | 16.01 |
| hsa-miR-23a-3p  | 72 | F12 | 20.16 | 18.19 |
| hsa-miR-23b-3p  | 73 | G01 | 20.05 | 18.33 |
| hsa-miR-24-3p   | 74 | G02 | 19.67 | 18.11 |
| hsa-miR-25-3p   | 75 | G03 | 22.41 | 21.09 |
| UniSp3 IPC      | 76 | G04 | 21.86 | 21.49 |
| hsa-miR-26b-5p  | 77 | G05 | 23.69 | 22.12 |
| UniSp3 IPC      | 78 | G06 | 21.85 | 21.72 |
| hsa-miR-27b-3p  | 79 | G07 | 20.08 | 18.32 |
| hsa-miR-29a-3p  | 80 | G08 | 19.97 | 18.61 |

|                |    |     |       |       |
|----------------|----|-----|-------|-------|
| hsa-miR-29b-3p | 81 | G09 | 20.02 | 18.97 |
| hsa-miR-29c-3p | 82 | G10 | 19.65 | 17.97 |
| hsa-miR-30b-5p | 83 | G11 | 22.57 | 21.10 |
| hsa-miR-30c-5p | 84 | G12 | 21.65 | 20.21 |
| hsa-miR-30d-5p | 85 | H01 | 22.37 | 20.48 |
| hsa-miR-31-5p  | 86 | H02 | 28.28 | 26.98 |
| hsa-miR-34a-5p | 87 | H03 | 24.77 | 23.58 |
| SNORD49A       | 88 | H04 | 19.59 | 17.68 |
| hsa-miR-423-5p | 89 | H05 | 24.42 | 23.35 |
| hsa-miR-7-5p   | 90 | H06 | 24.88 | 23.39 |
| hsa-miR-9-5p   | 91 | H07 | 27.39 | 25.73 |
| hsa-let-7e-5p  | 92 | H08 | 21.02 | 19.18 |
| hsa-miR-92b-3p | 93 | H09 | 25.98 | 24.19 |
| hsa-miR-93-5p  | 94 | H10 | 22.31 | 20.92 |
| hsa-miR-99a-5p | 95 | H11 | 25.50 | 23.89 |
| Blank (H2O)    | 96 | H12 |       |       |

---

**MDA-MB-231 - B31-Infected / Uninfected -**

| <b>Uninfected Cq<br/>Reference<br/>(SNORD38B)</b> | <b>Infected Cq<br/>Reference<br/>(SNORD38B)</b> | <b>dCt 48hr Uninfected<br/>(Uninfected Cq - Reference Cq)</b> |
|---------------------------------------------------|-------------------------------------------------|---------------------------------------------------------------|
| 19.73                                             | 18.04                                           | 0.35                                                          |
| 19.73                                             | 18.04                                           | 1.63                                                          |
| 19.73                                             | 18.04                                           | 1.82                                                          |
| 19.73                                             | 18.04                                           | 3.20                                                          |
| 19.73                                             | 18.04                                           | 16.49                                                         |
| 19.73                                             | 18.04                                           | 11.41                                                         |
| 19.73                                             | 18.04                                           | 2.13                                                          |
| 19.73                                             | 18.04                                           | 1.17                                                          |
| 19.73                                             | 18.04                                           | 17.31                                                         |
| 19.73                                             | 18.04                                           | 0.60                                                          |
| 19.73                                             | 18.04                                           | 2.54                                                          |
| 19.73                                             | 18.04                                           | 4.89                                                          |
| 19.73                                             | 18.04                                           | 1.31                                                          |
| 19.73                                             | 18.04                                           | 1.91                                                          |
| 19.73                                             | 18.04                                           | 2.79                                                          |
| 19.73                                             | 18.04                                           | 1.56                                                          |
| 19.73                                             | 18.04                                           | 16.51                                                         |
| 19.73                                             | 18.04                                           | -19.73                                                        |
| 19.73                                             | 18.04                                           | -0.11                                                         |
| 19.73                                             | 18.04                                           | 6.50                                                          |
| 19.73                                             | 18.04                                           | 2.87                                                          |
| 19.73                                             | 18.04                                           | 6.04                                                          |
| 19.73                                             | 18.04                                           | 7.84                                                          |
| 19.73                                             | 18.04                                           | 14.43                                                         |
| 19.73                                             | 18.04                                           | 8.45                                                          |
| 19.73                                             | 18.04                                           | 10.72                                                         |
| 19.73                                             | 18.04                                           | 10.21                                                         |
| 19.73                                             | 18.04                                           | 3.56                                                          |
| 19.73                                             | 18.04                                           | 17.54                                                         |
| 19.73                                             | 18.04                                           | 2.36                                                          |
| 19.73                                             | 18.04                                           | 10.84                                                         |
| 19.73                                             | 18.04                                           | 18.62                                                         |
| 19.73                                             | 18.04                                           | 1.12                                                          |
| 19.73                                             | 18.04                                           | 2.90                                                          |
| 19.73                                             | 18.04                                           | 11.16                                                         |
| 19.73                                             | 18.04                                           | 1.35                                                          |
| 19.73                                             | 18.04                                           | 2.77                                                          |

|       |       |        |
|-------|-------|--------|
| 19.73 | 18.04 | 2.29   |
| 19.73 | 18.04 | 3.76   |
| 19.73 | 18.04 | 5.47   |
| 19.73 | 18.04 | -19.73 |
| 19.73 | 18.04 | 0.58   |
| 19.73 | 18.04 | 6.91   |
| 19.73 | 18.04 | 4.28   |
| 19.73 | 18.04 | 2.58   |
| 19.73 | 18.04 | 6.40   |
| 19.73 | 18.04 | 8.62   |
| 19.73 | 18.04 | 6.08   |
| 19.73 | 18.04 | 7.61   |
| 19.73 | 18.04 | 8.63   |
| 19.73 | 18.04 | 0.75   |
| 19.73 | 18.04 | 1.06   |
| 19.73 | 18.04 | 2.04   |
| 19.73 | 18.04 | 10.33  |
| 19.73 | 18.04 | 7.93   |
| 19.73 | 18.04 | 17.23  |
| 19.73 | 18.04 | 5.59   |
| 19.73 | 18.04 | 17.62  |
| 19.73 | 18.04 | 20.67  |
| 19.73 | 18.04 | 1.29   |
| 19.73 | 18.04 | 17.38  |
| 19.73 | 18.04 | -3.71  |
| 19.73 | 18.04 | 3.42   |
| 19.73 | 18.04 | 10.03  |
| 19.73 | 18.04 | 6.55   |
| 19.73 | 18.04 | 0.00   |
| 19.73 | 18.04 | 0.28   |
| 19.73 | 18.04 | 0.88   |
| 19.73 | 18.04 | 0.59   |
| 19.73 | 18.04 | 13.86  |
|       |       |        |
| 19.73 | 18.04 | 0.42   |
| 19.73 | 18.04 | 0.31   |
| 19.73 | 18.04 | -0.06  |
| 19.73 | 18.04 | 2.68   |
| 19.73 | 18.04 | 2.12   |
| 19.73 | 18.04 | 3.95   |
| 19.73 | 18.04 | 2.12   |
| 19.73 | 18.04 | 0.35   |
| 19.73 | 18.04 | 0.24   |

|       |       |       |
|-------|-------|-------|
| 19.73 | 18.04 | 0.29  |
| 19.73 | 18.04 | -0.09 |
| 19.73 | 18.04 | 2.83  |
| 19.73 | 18.04 | 1.91  |
| 19.73 | 18.04 | 2.63  |
| 19.73 | 18.04 | 8.55  |
| 19.73 | 18.04 | 5.03  |
|       |       |       |
| 19.73 | 18.04 | 4.69  |
| 19.73 | 18.04 | 5.15  |
| 19.73 | 18.04 | 7.65  |
| 19.73 | 18.04 | 1.29  |
| 19.73 | 18.04 | 6.24  |
| 19.73 | 18.04 | 2.58  |
| 19.73 | 18.04 | 5.76  |
|       |       |       |

48hr

| dCt 48hr Infected<br>(Infected Cq - Reference Cq) | ddCt<br>(Infected dCt - Uninfected dCt) |
|---------------------------------------------------|-----------------------------------------|
| 0.25                                              | -0.09                                   |
| 2.33                                              | 0.70                                    |
| 1.43                                              | -0.39                                   |
| 3.18                                              | -0.01                                   |
| 20.02                                             | 3.53                                    |
| 12.40                                             | 0.99                                    |
| 2.01                                              | -0.12                                   |
| 1.39                                              | 0.22                                    |
| 17.12                                             | -0.19                                   |
| 0.74                                              | 0.14                                    |
| 2.22                                              | -0.32                                   |
| 4.25                                              | -0.64                                   |
| 1.24                                              | -0.07                                   |
| 2.10                                              | 0.19                                    |
| 3.05                                              | 0.27                                    |
| 1.78                                              | 0.22                                    |
| 13.96                                             | -2.55                                   |
| -18.04                                            | 1.70                                    |
| 0.13                                              | 0.24                                    |
| 6.21                                              | -0.29                                   |
| 2.66                                              | -0.22                                   |
| 6.39                                              | 0.35                                    |
| 7.63                                              | -0.20                                   |
| 15.07                                             | 0.64                                    |
| 8.78                                              | 0.33                                    |
| 11.98                                             | 1.26                                    |
| 11.32                                             | 1.11                                    |
| 2.77                                              | -0.79                                   |
| 19.51                                             | 1.97                                    |
| 2.22                                              | -0.14                                   |
| 10.42                                             | -0.42                                   |
| 19.35                                             | 0.73                                    |
| 1.17                                              | 0.05                                    |
| 2.49                                              | -0.41                                   |
| 11.35                                             | 0.19                                    |
| 0.67                                              | -0.68                                   |
| 2.35                                              | -0.43                                   |

|        |       |
|--------|-------|
| 3.38   | 1.10  |
| 4.10   | 0.34  |
| 5.66   | 0.19  |
| -18.04 | 1.70  |
| 0.26   | -0.32 |
| 6.46   | -0.45 |
| 4.19   | -0.09 |
| 2.61   | 0.03  |
| 6.49   | 0.09  |
| 9.08   | 0.46  |
| 6.32   | 0.24  |
| 7.79   | 0.19  |
| 9.17   | 0.53  |
| 0.64   | -0.11 |
| 1.11   | 0.05  |
| 3.45   | 1.41  |
| 10.48  | 0.15  |
| 8.22   | 0.29  |
| 15.26  | -1.97 |
| 6.17   | 0.58  |
| 17.50  | -0.12 |
| 15.69  | -4.98 |
| 1.50   | 0.21  |
| 16.31  | -1.07 |
| -3.54  | 0.16  |
| 3.83   | 0.41  |
| 8.61   | -1.41 |
| 6.40   | -0.15 |
| 0.00   | 0.00  |
| 0.91   | 0.63  |
| 0.97   | 0.09  |
| 0.32   | -0.27 |
| 13.54  | -0.32 |
|        |       |
| 0.16   | -0.26 |
| 0.30   | -0.02 |
| 0.07   | 0.13  |
| 3.05   | 0.37  |
| 3.46   | 1.34  |
| 4.08   | 0.12  |
| 3.69   | 1.57  |
| 0.28   | -0.07 |
| 0.57   | 0.34  |



|       |       |
|-------|-------|
| 0.93  | 0.65  |
| -0.06 | 0.02  |
| 3.06  | 0.23  |
| 2.17  | 0.26  |
| 2.44  | -0.19 |
| 8.94  | 0.39  |
| 5.54  | 0.51  |
|       |       |
| 5.32  | 0.63  |
| 5.36  | 0.21  |
| 7.69  | 0.04  |
| 1.14  | -0.14 |
| 6.16  | -0.09 |
| 2.89  | 0.31  |
| 5.85  | 0.09  |
|       |       |

|                                                       |                       |                         |
|-------------------------------------------------------|-----------------------|-------------------------|
|                                                       |                       |                         |
| <b>Expression Fold Change<br/>(2<sup>-ddCt</sup>)</b> |                       |                         |
| 1.07                                                  |                       |                         |
| 0.62                                                  | <b>Reference Gene</b> | SNORD49A (Diff = 1.91 ) |
| 1.31                                                  |                       |                         |
| 1.01                                                  |                       |                         |
| 0.09                                                  |                       |                         |
| 0.50                                                  |                       |                         |
| 1.09                                                  |                       |                         |
| 0.86                                                  |                       |                         |
| 1.14                                                  |                       |                         |
| 0.91                                                  |                       |                         |
| 1.25                                                  |                       |                         |
| 1.56                                                  |                       |                         |
| 1.05                                                  |                       |                         |
| 0.88                                                  |                       |                         |
| 0.83                                                  |                       |                         |
| 0.86                                                  |                       |                         |
| 5.86                                                  |                       |                         |
| 0.31                                                  |                       |                         |
| 0.85                                                  |                       |                         |
| 1.23                                                  |                       |                         |
| 1.16                                                  |                       |                         |
| 0.79                                                  |                       |                         |
| 1.15                                                  |                       |                         |
| 0.64                                                  |                       |                         |
| 0.80                                                  |                       |                         |
| 0.42                                                  |                       |                         |
| 0.46                                                  |                       |                         |
| 1.73                                                  |                       |                         |
| 0.25                                                  |                       |                         |
| 1.10                                                  |                       |                         |
| 1.34                                                  |                       |                         |
| 0.60                                                  |                       |                         |
| 0.97                                                  |                       |                         |
| 1.32                                                  |                       |                         |
| 0.87                                                  |                       |                         |
| 1.60                                                  |                       |                         |
| 1.34                                                  |                       |                         |

|       |  |  |
|-------|--|--|
| 0.47  |  |  |
| 0.79  |  |  |
| 0.87  |  |  |
| 0.31  |  |  |
| 1.25  |  |  |
| 1.36  |  |  |
| 1.06  |  |  |
| 0.98  |  |  |
| 0.94  |  |  |
| 0.73  |  |  |
| 0.84  |  |  |
| 0.88  |  |  |
| 0.69  |  |  |
| 1.08  |  |  |
| 0.96  |  |  |
| 0.38  |  |  |
| 0.90  |  |  |
| 0.82  |  |  |
| 3.92  |  |  |
| 0.67  |  |  |
| 1.09  |  |  |
| 31.62 |  |  |
| 0.87  |  |  |
| 2.11  |  |  |
| 0.89  |  |  |
| 0.75  |  |  |
| 2.66  |  |  |
| 1.11  |  |  |
| 1.00  |  |  |
| 0.65  |  |  |
| 0.94  |  |  |
| 1.20  |  |  |
| 1.25  |  |  |
|       |  |  |
| 1.20  |  |  |
| 1.01  |  |  |
| 0.91  |  |  |
| 0.77  |  |  |
| 0.40  |  |  |
| 0.92  |  |  |
| 0.34  |  |  |
| 1.05  |  |  |
| 0.79  |  |  |

|      |  |  |
|------|--|--|
| 0.64 |  |  |
| 0.98 |  |  |
| 0.85 |  |  |
| 0.84 |  |  |
| 1.14 |  |  |
| 0.76 |  |  |
| 0.70 |  |  |
|      |  |  |
| 0.65 |  |  |
| 0.87 |  |  |
| 0.97 |  |  |
| 1.10 |  |  |
| 1.06 |  |  |
| 0.81 |  |  |
| 0.94 |  |  |
|      |  |  |

| miRNA Name      | Fold Change (MDA-MB-231) |
|-----------------|--------------------------|
| hsa-miR-143-3p  | -2.40                    |
| hsa-miR-202-3p  | 3.92                     |
|                 |                          |
| hsa-miR-145-5p  | -2.16                    |
| hsa-miR-181a-5p | -2.14                    |
| hsa-miR-206     | 31.62                    |
| hsa-miR-20b-5p  | 2.11                     |
| hsa-miR-214-3p  | 2.66                     |
|                 |                          |
| hsa-miR-200a-3p | -1.99                    |
| hsa-let-7f-5p   | 0.80                     |
| hsa-miR-146a-5p | 1.73                     |
| hsa-miR-222-3p  | 0.83                     |
| hsa-miR-223-3p  | 0.80                     |

**NOTE:** All expression fold changes recorded on this page are the manually calculated values

**Qiagen Human Cancer Focus miRNA PCR Panel Expression**

MDA-MB-231

**Qiagen Analysis Tool Results**

| <b>miRNA Name</b> | <b>Fold Change</b> |
|-------------------|--------------------|
| hsa-let-7a-5p     | 1.07               |
| hsa-let-7b-5p     | -1.63              |
| hsa-let-7c-5p     | 1.31               |
| hsa-let-7d-5p     | 1.01               |
| hsa-miR-200a-3p   | -1.99              |
| hsa-let-7g-5p     | 1.09               |
| hsa-let-7i-5p     | -1.17              |
| hsa-miR-1-3p      | 1.14               |
| hsa-miR-100-5p    | -1.10              |
| hsa-let-7f-5p     | 1.25               |
| hsa-miR-101-3p    | 1.56               |
| hsa-miR-103a-3p   | 1.05               |
| hsa-miR-106a-5p   | -1.14              |
| hsa-miR-106b-5p   | -1.20              |
| hsa-miR-107       | -1.16              |
| hsa-miR-125b-5p   | -1.18              |
| hsa-miR-126-3p    | 1.23               |
| hsa-miR-130a-3p   | 1.16               |
| hsa-miR-132-3p    | -1.27              |
| hsa-miR-10b-5p    | 1.15               |
| hsa-miR-133a-3p   | -1.56              |
| hsa-miR-141-3p    | -1.26              |
| hsa-miR-143-3p    | -2.40              |
| hsa-miR-145-5p    | -2.16              |
| hsa-miR-146a-5p   | 1.73               |
| hsa-miR-26a-5p    | 1.10               |
| hsa-miR-150-5p    | 1.34               |
| hsa-miR-155-5p    | -1.66              |
| hsa-miR-15a-5p    | -1.04              |
| hsa-miR-15b-5p    | 1.32               |
| hsa-miR-149-3p    | -1.14              |
| hsa-miR-16-5p     | 1.60               |
| hsa-miR-17-5p     | 1.34               |
| hsa-miR-181a-5p   | -2.14              |
| hsa-miR-181b-5p   | -1.27              |
| hsa-miR-182-5p    | -1.14              |
| hsa-miR-27a-3p    | 1.25               |
| hsa-miR-186-5p    | 1.36               |
| hsa-miR-18a-5p    | 1.06               |

|                 |       |
|-----------------|-------|
| hsa-miR-191-5p  | -1.02 |
| hsa-miR-192-5p  | -1.06 |
| hsa-miR-148a-3p | -1.38 |
| hsa-miR-194-5p  | -1.18 |
| hsa-miR-195-5p  | -1.14 |
| hsa-miR-196a-5p | -1.45 |
| hsa-miR-19a-3p  | 1.08  |
| hsa-miR-19b-3p  | -1.04 |
| hsa-miR-200b-3p | -1.11 |
| hsa-miR-200c-3p | -1.22 |
| hsa-miR-202-3p  | 3.92  |
| hsa-miR-10a-5p  | -1.49 |
| hsa-miR-205-5p  | 1.09  |
| hsa-miR-206     | 26.06 |
| hsa-miR-20a-5p  | -1.15 |
| hsa-miR-20b-5p  | 2.11  |
| hsa-miR-21-5p   | -1.12 |
| hsa-miR-210-3p  | -1.33 |
| hsa-miR-214-3p  | 2.66  |
| hsa-miR-215-5p  | 1.11  |
| SNORD38B (hsa)  | 1.00  |
| hsa-miR-22-3p   | -1.55 |
| hsa-miR-221-3p  | -1.06 |
| hsa-miR-222-3p  | 1.20  |
| hsa-miR-223-3p  | 1.25  |
| U6 snRNA        | 1.37  |
| hsa-miR-23a-3p  | 1.20  |
| hsa-miR-23b-3p  | 1.01  |
| hsa-miR-24-3p   | -1.10 |
| hsa-miR-25-3p   | -1.30 |
| hsa-miR-26b-5p  | -1.09 |
| hsa-miR-27b-3p  | 1.05  |
| hsa-miR-29a-3p  | -1.26 |
| hsa-miR-29b-3p  | -1.56 |
| hsa-miR-29c-3p  | -1.02 |
| hsa-miR-30b-5p  | -1.17 |
| hsa-miR-30c-5p  | -1.20 |
| hsa-miR-30d-5p  | 1.14  |
| hsa-miR-31-5p   | -1.31 |
| hsa-miR-34a-5p  | -1.42 |
| SNORD49A (hsa)  | 1.16  |
| hsa-miR-423-5p  | -1.55 |
| hsa-miR-7-5p    | -1.16 |
| hsa-miR-9-5p    | -1.03 |
| hsa-let-7e-5p   | 1.10  |
| hsa-miR-92b-3p  | 1.06  |

|                |       |
|----------------|-------|
| hsa-miR-93-5p  | -1.24 |
| hsa-miR-99a-5p | -1.06 |



---

**on-Fold Change Results (48hr B31-Infected/Uninfected Sam**





---

ple)

| Upregulated miRNAs |                 |             |
|--------------------|-----------------|-------------|
| Position           | Symbol          | Fold change |
| A01                | hsa-let-7a-5p   | 1.07        |
| A03                | hsa-let-7c-5p   | 1.31        |
| A04                | hsa-let-7d-5p   | 1.01        |
| A07                | hsa-let-7g-5p   | 1.09        |
| A09                | hsa-miR-1-3p    | 1.14        |
| A11                | hsa-let-7f-5p   | 1.25        |
| A12                | hsa-miR-101-3p  | 1.56        |
| B01                | hsa-miR-103a-3p | 1.05        |
| B08                | hsa-miR-126-3p  | 1.23        |
| B09                | hsa-miR-130a-3p | 1.16        |
| B11                | hsa-miR-10b-5p  | 1.15        |
| C04                | hsa-miR-146a-5p | 1.73        |
| C06                | hsa-miR-26a-5p  | 1.1         |
| C07                | hsa-miR-150-5p  | 1.34        |
| C10                | hsa-miR-15b-5p  | 1.32        |
| C12                | hsa-miR-16-5p   | 1.6         |
| D01                | hsa-miR-17-5p   | 1.34        |
| D06                | hsa-miR-27a-3p  | 1.25        |
| D07                | hsa-miR-186-5p  | 1.36        |
| D08                | hsa-miR-18a-5p  | 1.06        |
| E03                | hsa-miR-19a-3p  | 1.08        |
| E08                | hsa-miR-202-3p  | 3.92        |
| E10                | hsa-miR-205-5p  | 1.09        |
| E11                | hsa-miR-206     | 26.06       |
| F01                | hsa-miR-20b-5p  | 2.11        |
| F04                | hsa-miR-214-3p  | 2.66        |
| F05                | hsa-miR-215-5p  | 1.11        |
| F06                | SNORD38B (hsa)  | 1           |
| F09                | hsa-miR-222-3p  | 1.2         |
| F10                | hsa-miR-223-3p  | 1.25        |
| F11                | U6 snRNA        | 1.37        |
| F12                | hsa-miR-23a-3p  | 1.2         |
| G01                | hsa-miR-23b-3p  | 1.01        |
| G07                | hsa-miR-27b-3p  | 1.05        |
| H01                | hsa-miR-30d-5p  | 1.14        |
| H04                | SNORD49A (hsa)  | 1.16        |
| H08                | hsa-let-7e-5p   | 1.1         |
| H09                | hsa-miR-92b-3p  | 1.06        |

| Downregulated n |                 |
|-----------------|-----------------|
| Position        | Symbol          |
| A02             | hsa-let-7b-5p   |
| A06             | hsa-miR-200a-3p |
| A08             | hsa-let-7i-5p   |
| A10             | hsa-miR-100-5p  |
| B02             | hsa-miR-106a-5p |
| B03             | hsa-miR-106b-5p |
| B04             | hsa-miR-107     |
| B07             | hsa-miR-125b-5p |
| B10             | hsa-miR-132-3p  |
| B12             | hsa-miR-133a-3p |
| C01             | hsa-miR-141-3p  |
| C02             | hsa-miR-143-3p  |
| C03             | hsa-miR-145-5p  |
| C08             | hsa-miR-155-5p  |
| C09             | hsa-miR-15a-5p  |
| C11             | hsa-miR-149-3p  |
| D02             | hsa-miR-181a-5p |
| D03             | hsa-miR-181b-5p |
| D04             | hsa-miR-182-5p  |
| D09             | hsa-miR-191-5p  |
| D10             | hsa-miR-192-5p  |
| D11             | hsa-miR-148a-3p |
| D12             | hsa-miR-194-5p  |
| E01             | hsa-miR-195-5p  |
| E02             | hsa-miR-196a-5p |
| E04             | hsa-miR-19b-3p  |
| E06             | hsa-miR-200b-3p |
| E07             | hsa-miR-200c-3p |
| E09             | hsa-miR-10a-5p  |
| E12             | hsa-miR-20a-5p  |
| F02             | hsa-miR-21-5p   |
| F03             | hsa-miR-210-3p  |
| F07             | hsa-miR-22-3p   |
| F08             | hsa-miR-221-3p  |
| G02             | hsa-miR-24-3p   |
| G03             | hsa-miR-25-3p   |
| G05             | hsa-miR-26b-5p  |
| G08             | hsa-miR-29a-3p  |
| G09             | hsa-miR-29b-3p  |
| G10             | hsa-miR-29c-3p  |
| G11             | hsa-miR-30b-5p  |
| G12             | hsa-miR-30c-5p  |
| H02             | hsa-miR-31-5p   |
| H03             | hsa-miR-34a-5p  |

|     |                |
|-----|----------------|
| H05 | hsa-miR-423-5p |
| H06 | hsa-miR-7-5p   |
| H07 | hsa-miR-9-5p   |
| H10 | hsa-miR-93-5p  |
| H11 | hsa-miR-99a-5p |

| miRNAs      |
|-------------|
| Fold Change |
| -1.63       |
| -1.99       |
| -1.17       |
| -1.1        |
| -1.14       |
| -1.2        |
| -1.16       |
| -1.18       |
| -1.27       |
| -1.56       |
| -1.26       |
| -2.4        |
| -2.16       |
| -1.66       |
| -1.04       |
| -1.14       |
| -2.14       |
| -1.27       |
| -1.14       |
| -1.02       |
| -1.06       |
| -1.38       |
| -1.18       |
| -1.14       |
| -1.45       |
| -1.04       |
| -1.11       |
| -1.22       |
| -1.49       |
| -1.15       |
| -1.12       |
| -1.33       |
| -1.55       |
| -1.06       |
| -1.1        |
| -1.3        |
| -1.09       |
| -1.26       |
| -1.56       |
| -1.02       |
| -1.17       |
| -1.2        |
| -1.31       |
| -1.42       |

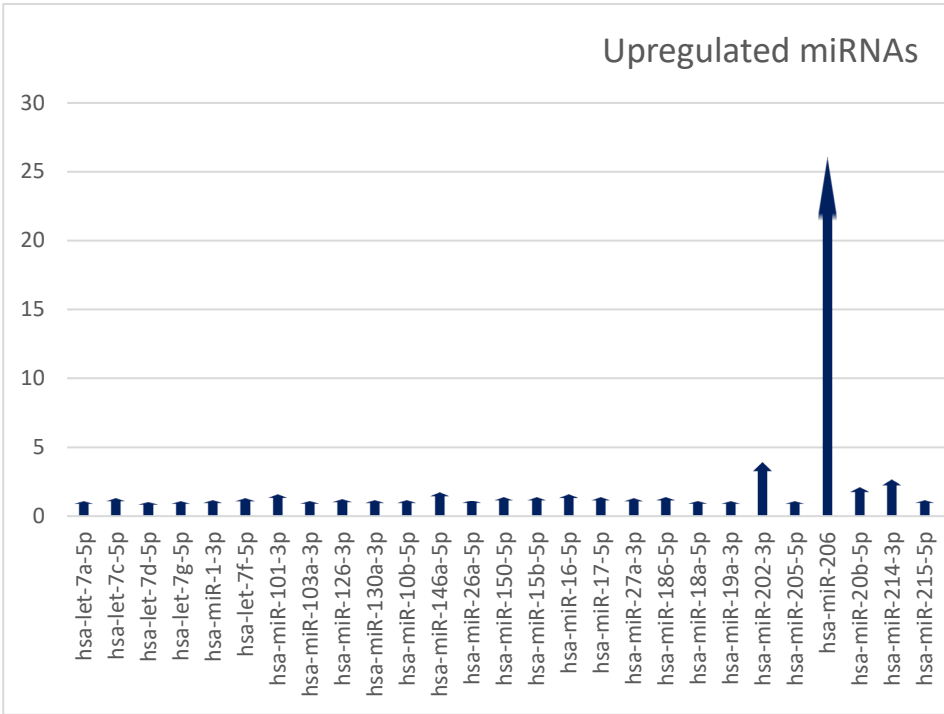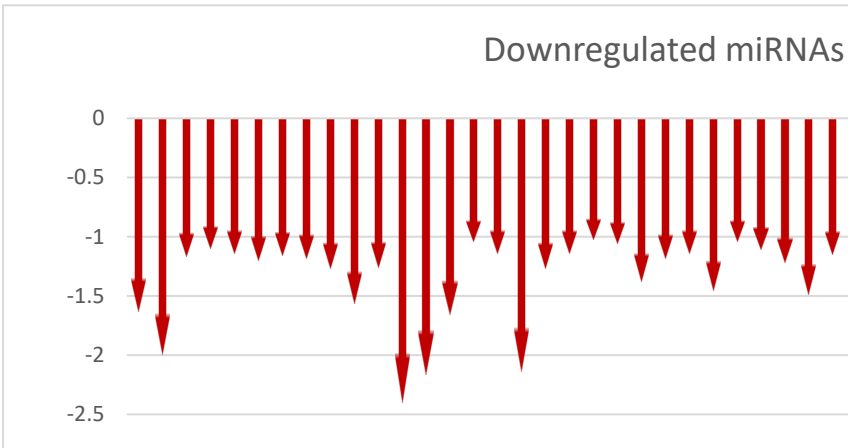

|       |
|-------|
| -1.55 |
| -1.16 |
| -1.03 |
| -1.24 |
| -1.06 |

|                 |
|-----------------|
| -3              |
| hsa-let-7b-5p   |
| hsa-let-7i-5p   |
| hsa-miR-106a-5p |
| hsa-miR-107     |
| hsa-miR-132-3p  |
| hsa-miR-141-3p  |
| hsa-miR-145-5p  |
| hsa-miR-15a-5p  |
| hsa-miR-181a-5p |
| hsa-miR-182-5p  |
| hsa-miR-192-5p  |
| hsa-miR-194-5p  |
| hsa-miR-196a-5p |
| hsa-miR-200b-3p |
| hsa-miR-10a-5p  |
| hsa-miR-21-5p   |
| hsa-miR-21-5p   |



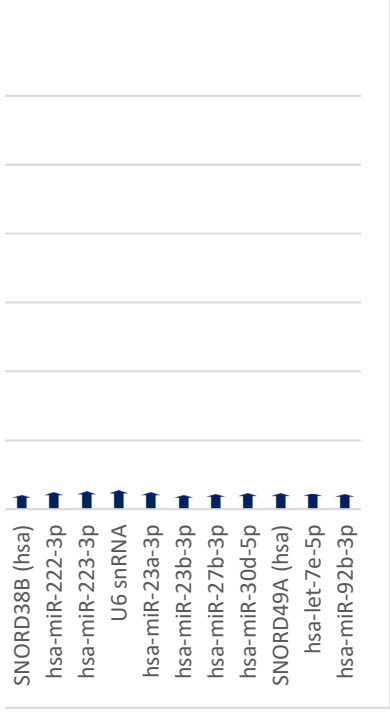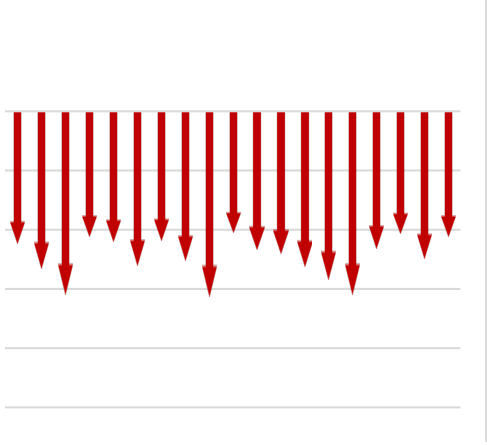

sp  
mir-22-3p  
hsa-mir-24-3p  
hsa-mir-26b-5p  
hsa-mir-29b-3p  
hsa-mir-30b-5p  
hsa-mir-31-5p  
hsa-mir-423-5p  
hsa-mir-9-5p  
hsa-mir-99a-5p
